# Supplementary material for: Selective formation of integrated stacks of (α-diimine)(ethylenediamine)platinum(II) and neutral π systems of the phenanthrene type †
Source: Royal Society of Chemistry journal article supplement (doi:10.1039/b007292n), 2001-01-01
Supplement: b007292n_s2.pdf [file b007292n_s2.pdf]

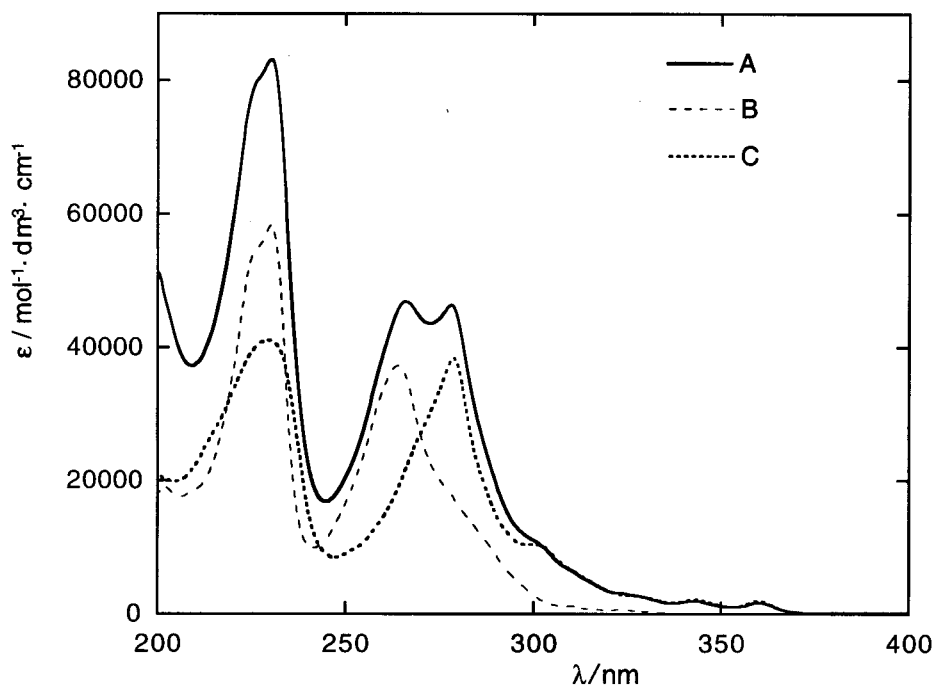

Fig. S2. UV-Vis absorption spectra of: (A)  $[\text{Pt}(\text{en})(\text{phen})](\text{PF}_6)_2 \cdot \text{phen} \cdot 2\text{H}_2\text{O}$ , (B) free phen, (c)  $[\text{Pt}(\text{en})(\text{phen})](\text{PF}_6)_2$  in EtOH/MeOH(4:1 v/v).
