# Supplementary material for: Selective formation of integrated stacks of (α-diimine)(ethylenediamine)platinum(II) and neutral π systems of the phenanthrene type †
Source: Royal Society of Chemistry journal article supplement (doi:10.1039/b007292n), 2001-01-01
Supplement: b007292n_s3.pdf [file b007292n_s3.pdf]

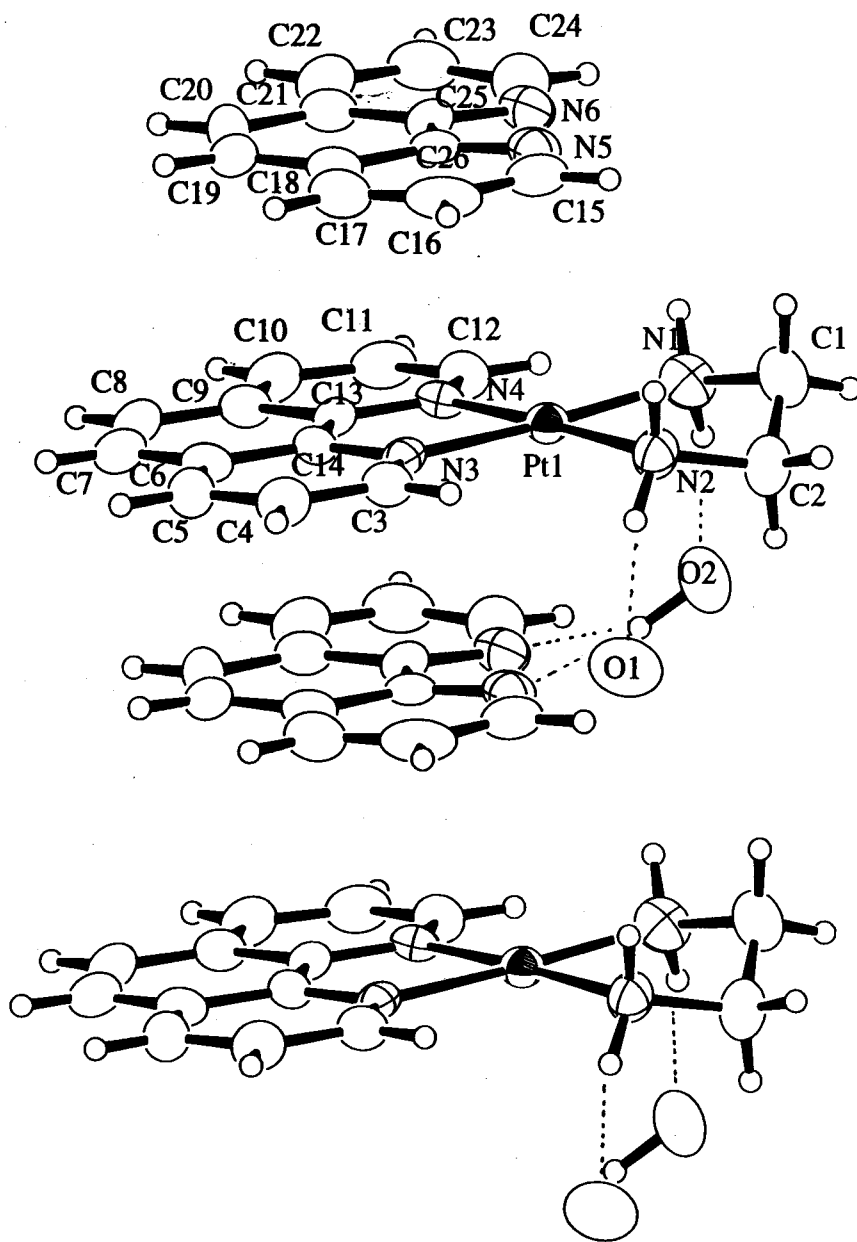

**Fig. S3.** Perspective view of the integrated stack in the crystal of  $[\text{Pt}(\text{en})(\text{phen})](\text{PF}_6)_2 \cdot \text{phen}$  (2).
