# Supplementary figures and images for: Selective formation of integrated stacks of (α-diimine)(ethylenediamine)platinum(II) and neutral π systems of the phenanthrene type †
Source: Royal Society of Chemistry journal article supplement (doi:10.1039/b007292n), 2001-01-01

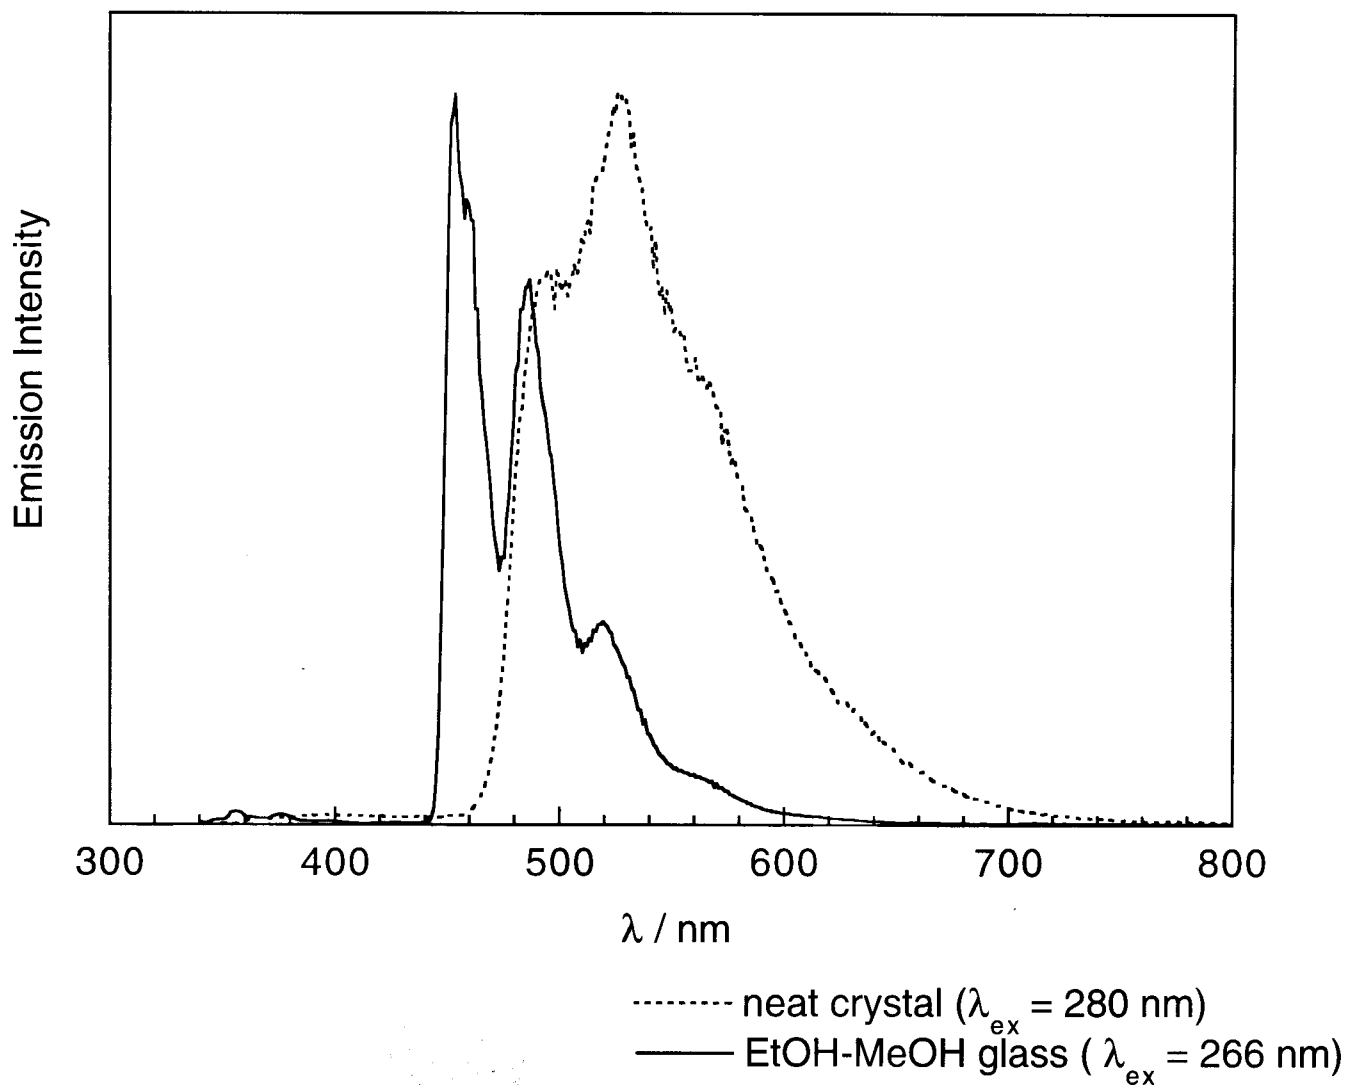

Fig. S4. Emission Spectra of  $[\text{Pt}(\text{en})(\text{phen})](\text{PF}_6)_2 \cdot \text{phen} \cdot 2\text{H}_2\text{O}$  (2)

Supplement: b007292n_s4.pdf [file b007292n_s4.pdf]
